# Supplementary material for: Pseudomonas Diversity Within Urban Freshwaters
Source: Front Microbiol. 2019 Feb 15;10:195. doi: 10.3389/fmicb.2019.00195 (PMC6384249; doi:10.3389/fmicb.2019.00195)
Supplement: Supplementary file 5 [file Table_5.XLSX]

## Sheet: Data Sheet 6
Supplementary Data Sheet 6. Core subsystems and strain specific pathways present within the genomes per RAST annotations.	P. alcaligenes strain MB-090714	P. chlororaphis strain LBs-160603	P. fulva strain 57B-090714	P. fulva strain LB-090714	P. jessenii strain LBp-160603	P. koreensis strain 57B-090624	P. koreensis strain LB-090714	P. mosselii strain LB-090624	P. mosselii strain LBp-160603	P. protegens strain MB-090624	P. protegens strain MB-090714	P. soli strain 57B-090714	Pseudomonas sp. 57B-090624	Pseudomonas sp. LB-090624	Pseudomonas sp. MB-090624
Nitrogen Metabolism
Ammonia assimilation	+	+	+	+	+	+	+	+	+	+	+	+	+	+	+
Denitrifying reductase		+						+	+	+	+	+	+
Nitrate & Nitrite ammonification	+	+			+	+	+	+	+	+	+	+	+	+	+
Nitrilase		+			+	+	+	+	+	+	+	+
Nitrosative stress	+	+	+	+	+			+	+	+	+	+	+	+	+
Sulfur Metabolism
Alkanesulfonates	+	+	+	+	+	+	+	+	+	+	+	+	+	+	+
L-Cysteine													+		+
Taurine		+	+	+	+	+	+	+	+	+	+	+	+	+	+
Monosaccharides
2-Ketogluconate utilization		+	+	+	+	+	+	+	+	+	+	+		+	+
Deoxyribose & Deoxynucleoside catabolism		+			+	+	+	+	+	+	+	+	+	+	+
D-galactarate, D-glucarate & D-glycerate catabolism	+	+	+	+	+	+	+	+	+	+	+	+	+	+	+
D-galactonate catabolism					+	+	+								+
D-gluconate & ketogluconates metabolism		+	+	+	+	+	+	+	+	+	+	+	+	+	+
D-ribose utilization		+	+	+	+	+	+	+	+	+	+	+		+	+
Fructose utilization		+	+	+	+	+	+	+	+	+	+	+	+	+	+
L-Arabinose utilization					+	+	+
Mannose metabolism	+	+	+	+	+	+	+	+	+	+	+	+	+	+	+
Xylose utilization		+			+	+	+	+	+	+	+	+
Polysaccharides
Alpha-Amylase					+					+	+
Glycogen metabolism		+	+	+	+	+	+	+	+	+	+	+	+	+	+
Organic acids
2-methylcitrate to 2-methylaconitate	+									+	+
Glycerate metabolism	+	+	+	+	+	+	+	+	+	+	+	+	+	+	+
Lactate utilization	+	+	+	+	+	+	+	+	+	+	+	+	+	+	+
Malonate decarboxylase		+			+	+	+			+	+		+	+	+
Methylcitrate cycle	+	+	+	+	+	+	+	+	+	+	+	+	+	+	+
Propionate-CoA to succinate	+	+	+	+	+	+	+	+	+	+	+	+	+	+	+
Tricarballylate utilization								+							+
Sugar alcohols
Glycerol & Glycerol-3-phosphate uptake & utilization	+	+	+	+	+	+	+	+	+	+	+	+	+	+	+
Inositol catabolism		+								+	+
